# Supplementary material for: Genome-Wide Analysis of Nubian Ibex Reveals Candidate Positively Selected Genes That Contribute to Its Adaptation to the Desert Environment
Source: MDPI journal article supplement (doi:10.3390/ani10112181), 2020-11-22
Supplement: s1 [file s1]

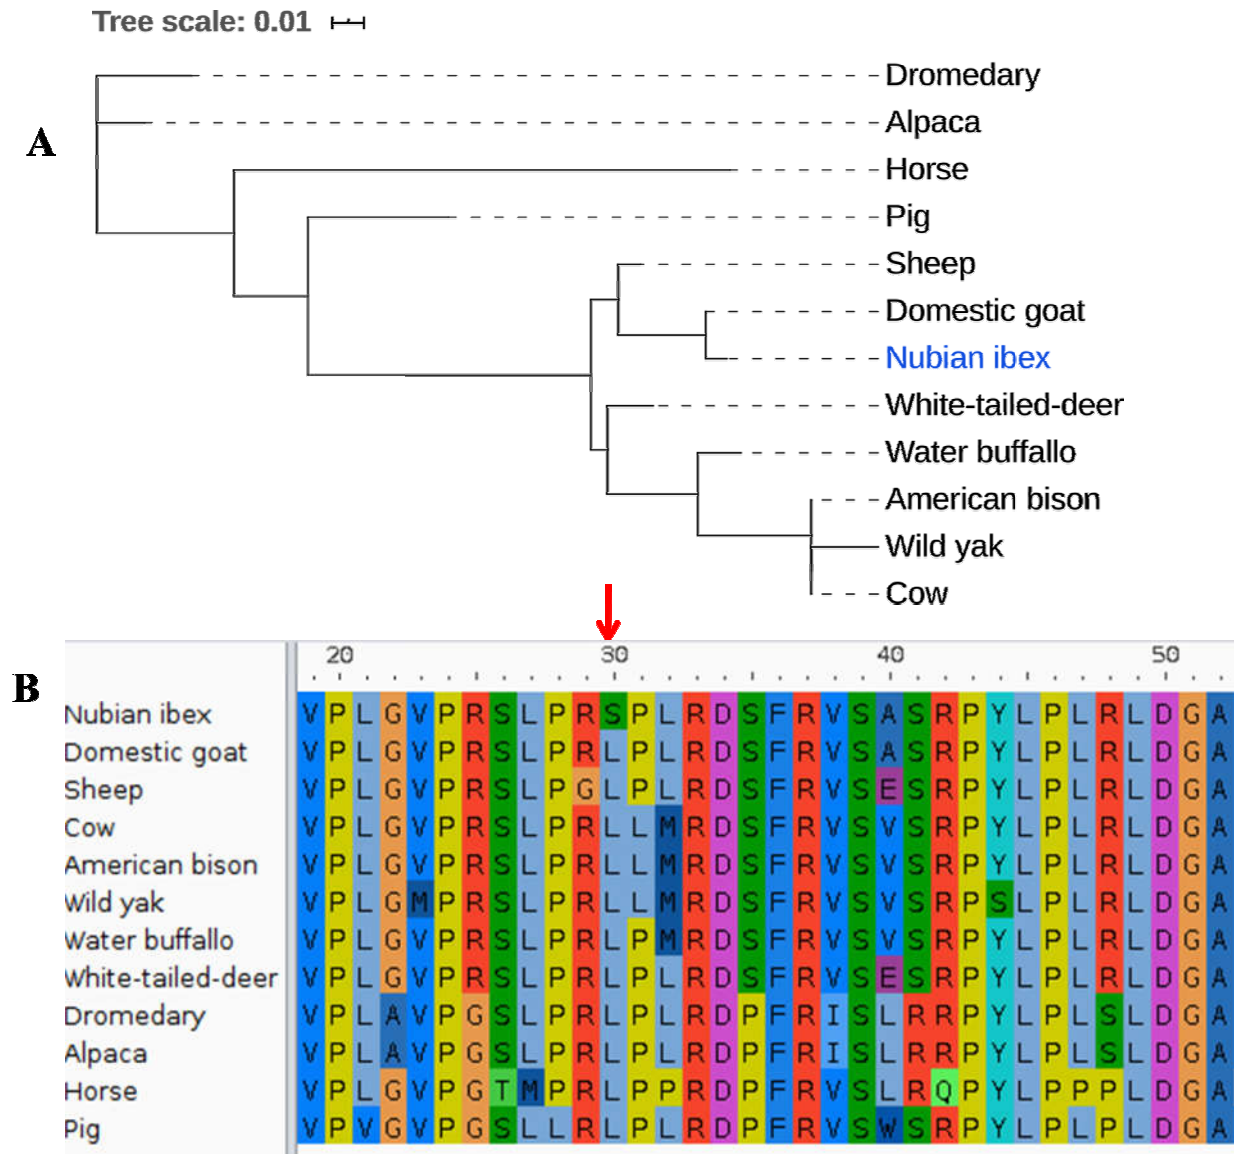

**Figure 1.** An illustration of the *ASCL4* gene phylogeny tree and alignment data used for dN/dS analysis. **A.** The maximum likelihood phylogenetic tree from *ASCL4* amino acid sequences of 12 species used for dN/dS analysis. **B.** The multiple sequence alignment of the 12 species used of dN/dS analysis showing amino acid site (L30S) under positive selection in *ASCL4* gene.

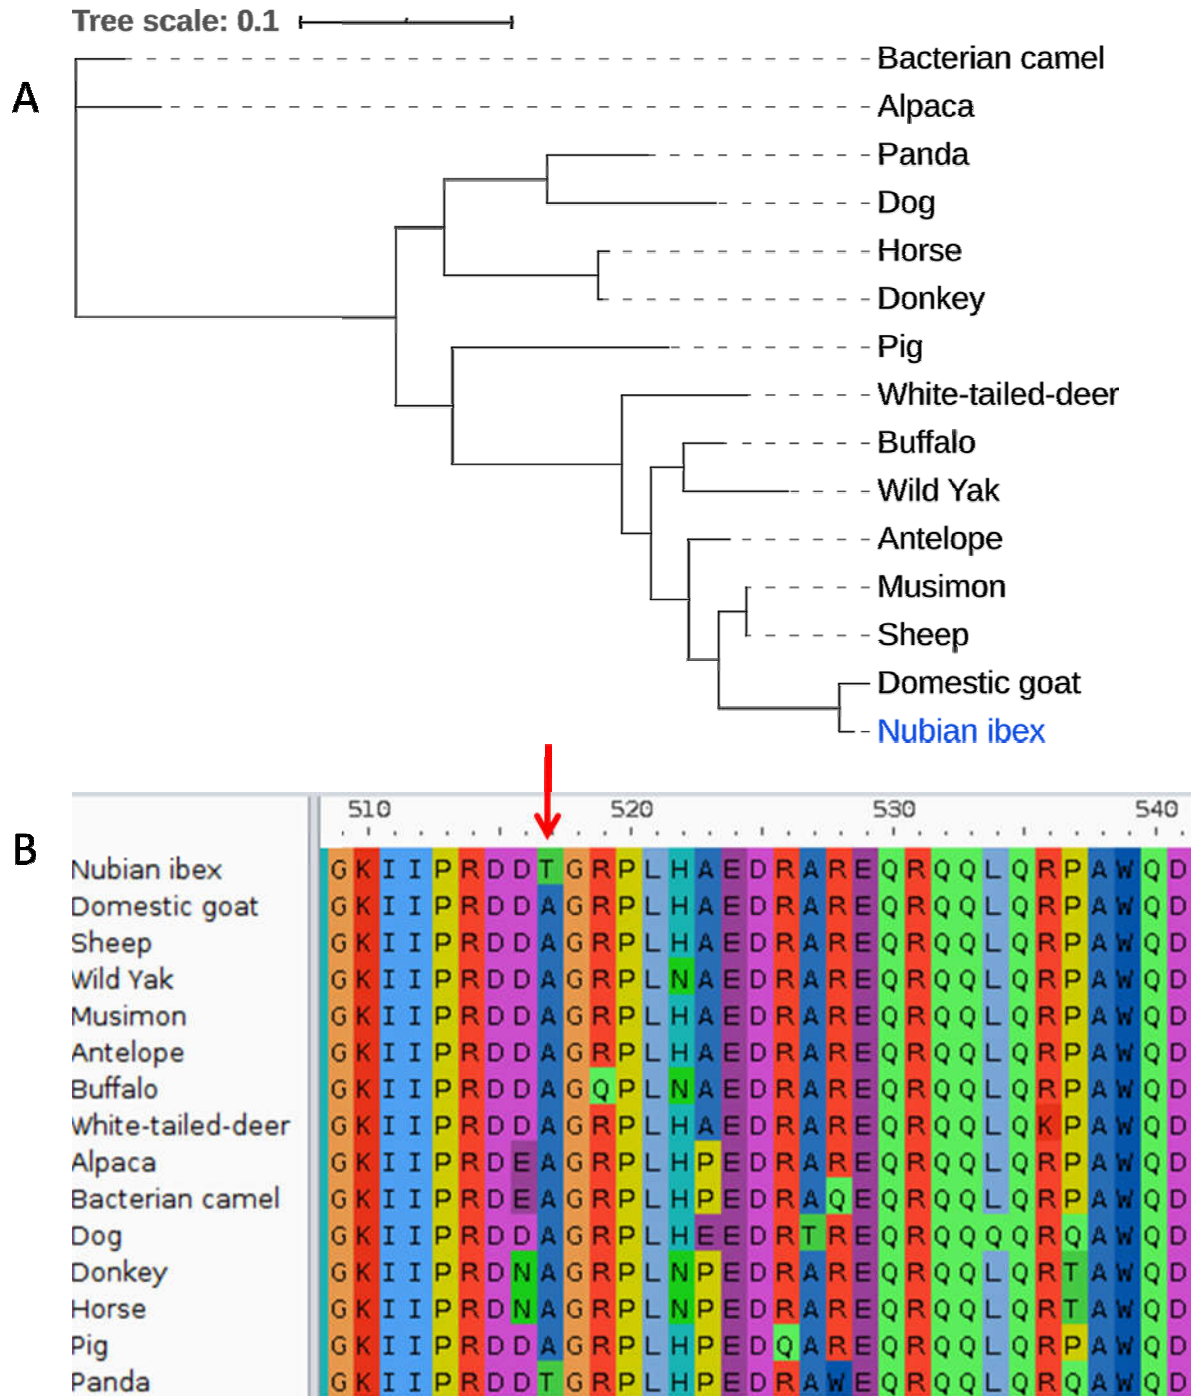

**Figure 2.** An illustration of the *UVSSA* gene phylogeny tree and alignment data used for dN/dS analysis. **A.** The maximum likelihood phylogenetic tree from *UVSSA* amino acid sequences of 15 species used for dN/dS analysis. **B.** The multiple sequence alignment of the 15 species used of dN/dS analysis showing amino acid site (T517A) under positive selection in *UVSSA* gene.
