# Supplementary material for: Genome-Wide Analysis of Nubian Ibex Reveals Candidate Positively Selected Genes That Contribute to Its Adaptation to the Desert Environment
Source: Animals (Basel). 2020 Nov 22;10(11):2181. doi: 10.3390/ani10112181 (PMC7700370; doi:10.3390/ani10112181)
Supplement: Supplementary file 1 [file animals-10-02181-s001.zip]

Archive with 6 entries (6 files):
- Supplemental File S1. Additional information for Nubian ibexes.docx
- Supplemental File S2. Data sources of the taxa used for positive selection analysis.docx
- Supplemental File S3. Codeml control file.docx
- Supplemental File S4. Positively selected amino acid sites and their functional impact.docx
- Supplemental File S5. Gene ontology terms for positively  selected genes.docx
- Supplemental File S6.  ASCL4 and UVSSA gene phylogenetic trees and  sequence alignments used for positive selection analysis.pdf
